# Supplementary material
Source: PubMed Central journal article supplement (PMC4131005)
Supplement: NIHMS59510-supplement-1.pdf [file NIHMS59510-supplement-1.pdf]

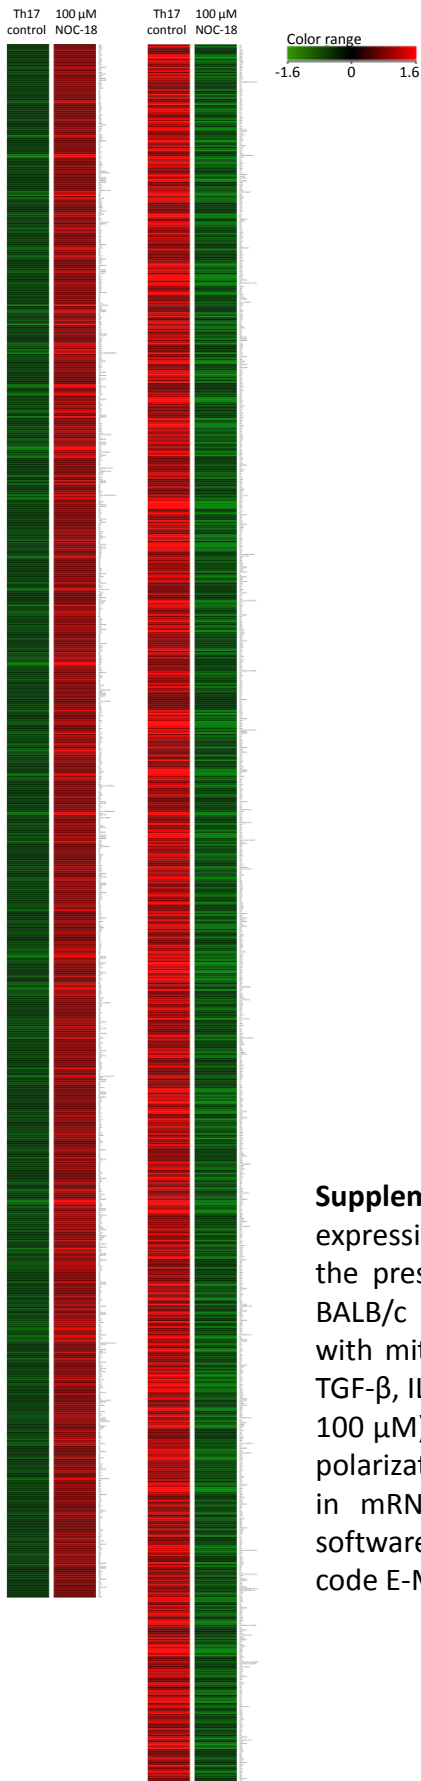

Supplementary Fig. 1

**Supplementary Figure 1** Microarray analysis of gene expression in CD4<sup>+</sup> T cells under Th7 polarization conditions in the presence or absence of NO. Purified CD4<sup>+</sup> T cells from BALB/c mice were cultured in round-bottom 96-well plate with mitomycin-C-treated APC and anti-CD3, anti-CD28, IL-6, TGF- $\beta$ , IL-23, IL-1 $\beta$ , anti-IFN $\gamma$  and anti-IL-4. NO donor (NOC-18, 100  $\mu$ M) was added at the start of the culture. After 3 days of polarization, cells were harvested and the relative alterations in mRNA were analysed using the Microarray Suite 5.0 software (Affymetrix) and deposited under the accession code E-MEXP-3959.

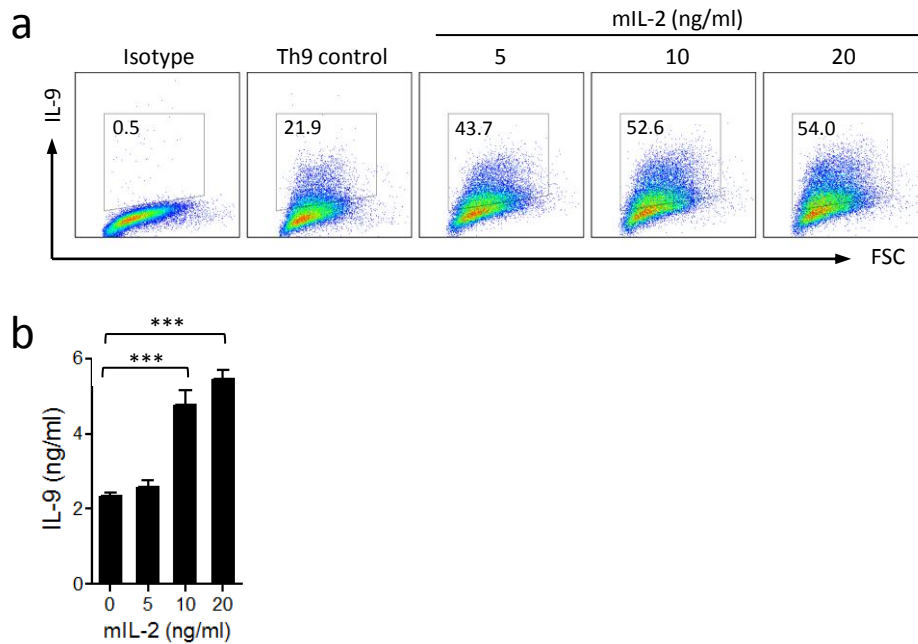

**Supplementary Figure 2** IL-2 enhances Th9 differentiation. CD4<sup>+</sup> T cells from BALB/c mice were polarized under Th9 polarizing conditions in the presence of IL-2. **(a)** Percentage IL-9<sup>+</sup> T cells on day 4 were analyzed by FACS and **(b)** IL-9 concentration in the culture supernatant on day 5 determined by ELISA. Data are representative of 3 experiments; mean  $\pm$  SEM, n=3, \*\*\*P<0.001

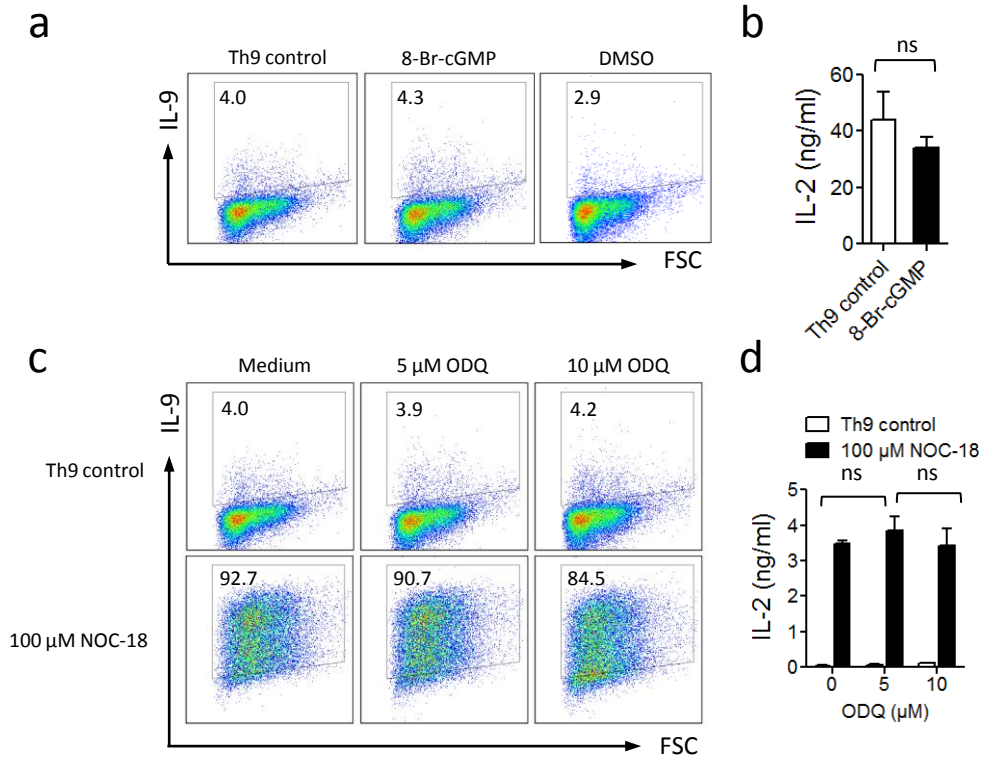

**Supplementary Figure 3** NO-mediated enhancement of Th9 differentiation is independent of cGMP. CD4<sup>+</sup> T cells from BALB/c mice were cultured under Th9 polarizing conditions with 8-Br-cGMP (5 mM) or the vehicle (DMSO). **(a)** Percentage of IL-9<sup>+</sup> T cells was analyzed by FACS on day 4. **(b)** IL-2 in the culture supernatant on day 5 determined by ELISA. CD4<sup>+</sup> T cells were polarized under Th9 conditions ± NO in the presence of ODQ, a specific inhibitor of cyclic guanylate cyclase. **(c)** Percentage IL-9<sup>+</sup> T cells on day 4 were analyzed by FACS and **(d)** IL-2 concentration in the culture supernatant on day 5 determined by ELISA. Data are representative of 3 experiments; mean ± SEM, n=3, ns = not significant.

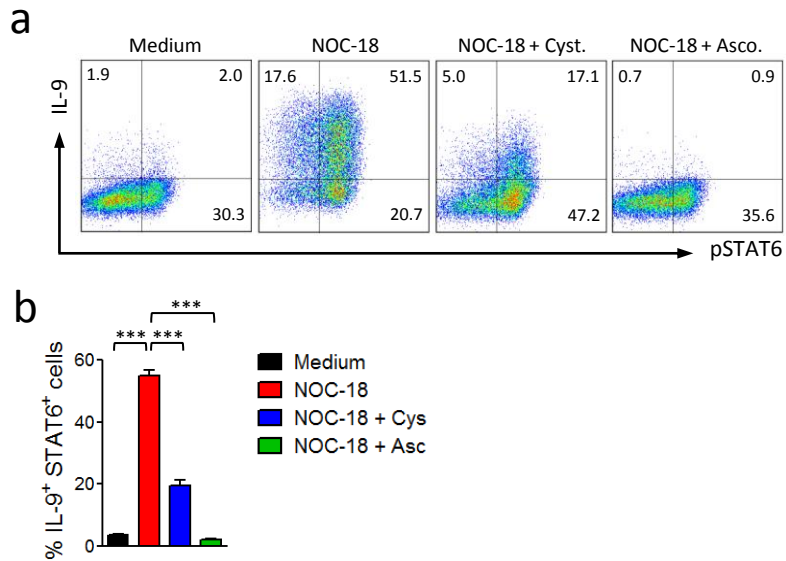

**Supplementary Figure 4** NO induces STAT6 phosphorylation during Th9 cell differentiation. CD4<sup>+</sup> cells were polarized under Th9 polarizing conditions in the presence of NOC-18 (100  $\mu$ M) and cysteine (1 mM) or ascorbate (300  $\mu$ M). **(a)** Percentage of IL-9<sup>+</sup>pSTAT6<sup>+</sup> T cells on day 5 were analyzed by FACS. **(b)** Pooled results of 3 experiments. Data are mean  $\pm$  SEM, n=3, \*\*\*P<0.001.

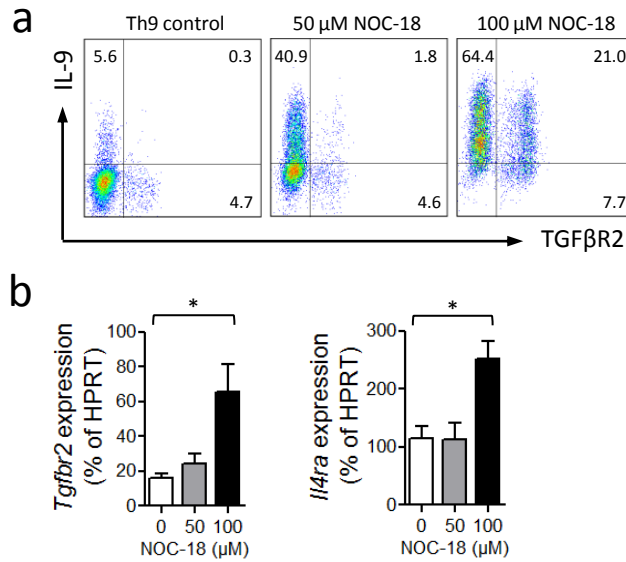

**Supplementary Figure 5** TGFβR1 and IL-4R expression are up-regulated by NO during Th9 differentiation. CD4 T cells from BALB/c mice were cultured under Th9 polarizing conditions with NOC-18 (100 μM). **(a)** Percentage of IL-9<sup>+</sup> and TGFβR2<sup>+</sup> T cells on day 3 analyzed by FACS. **(b)** *Tgfbr2* and *Il4ra* mRNA expression on day 3 was determined by qPCR. Data are representative of 3 independent experiments; mean ± SEM, n=3, \* P<0.05.

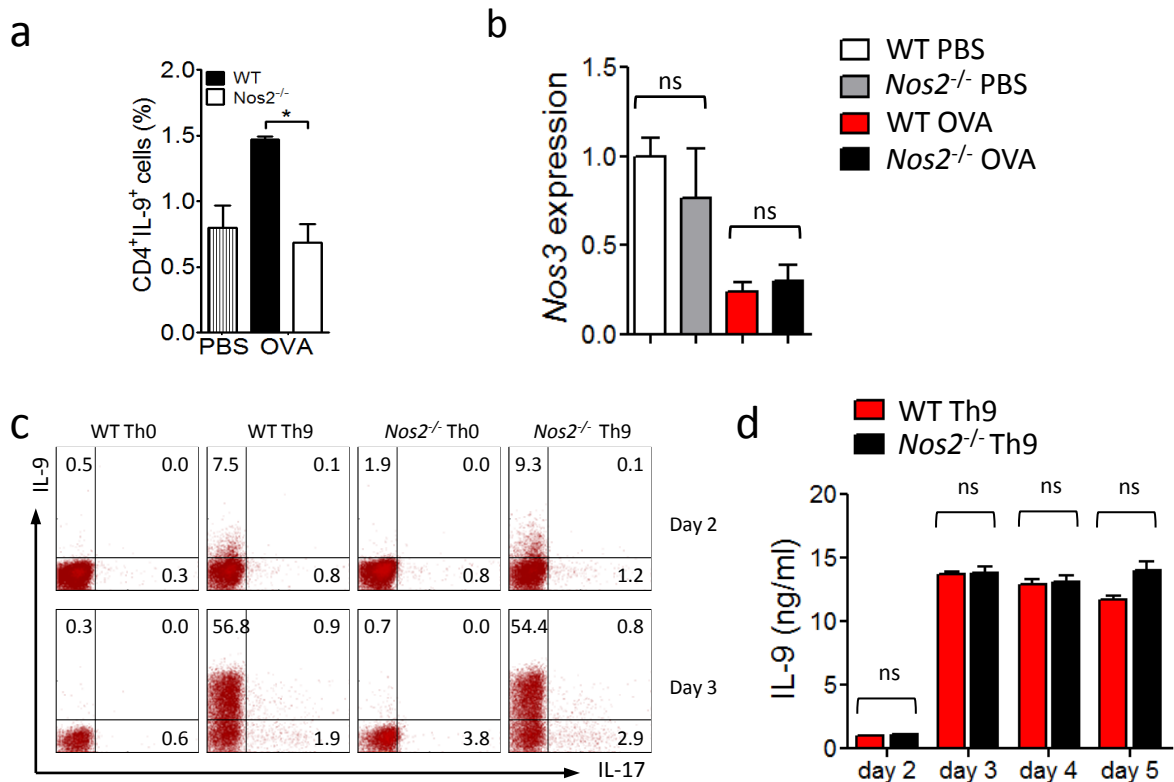

**Supplementary Fig. 6.** (a) WT and *Nos2*<sup>-/-</sup> mice were immunized s.c. with OVA on day 1 and 7 and sacrificed on day 10. Draining LN cells were harvested and analyzed for CD4<sup>+</sup>IL-9<sup>+</sup> cells by FACS. Hatched column = pooled of DLN of 3 naïve WT and 3 *Nos2*<sup>-/-</sup> mice which had similar % of Th9 cells. Data are representative of 2 independent experiments; mean ± SEM, n=4, \* P<0.05.

(b) qPCR analysis of *Nos3* expression in the lung of WT and *Nos2*<sup>-/-</sup> mice immunized s.c. with OVA (days 1 and 7) and challenged i.n. (days 14-16) with OVA or PBS. Lung cells were harvested on day 17. Vertical bars are mean ± SEM, n=5, ns = not significant. (c) Percentage of Th9 cells (FACS, representative of 5 mice per group) and IL-9 production (ELISA in culture supernatant) by CD4<sup>+</sup> T cells from *Nos2*<sup>-/-</sup> and WT mice polarized *in vitro* for 3 days under Th9 differentiation conditions (plate-bound αCD3, αCD28, IL-4, TGFβ, IL-2). ELISA, mean ± SEM, n=5.
